# Supplementary material for: Relating Attentional Biases for Stimuli Associated with Social Reward and Punishment to Autistic Traits
Source: Oxford University Press journal article supplement (doi:10.1525/collabra.119), 2018-01-01
Supplement: collabra-4-119-s1.xlsx [file collabra-4-119-s1.xlsx]

## Sheet: Happy condition
RT				ACCURACY
Absent	Low	High		Absent	Low	High		AQ	Sex	Age
579	622	605		78.3	88.3	75		10	M	20
728	739	772		78.3	73.3	78.3		23	F	18
710	676	702		88.3	88.3	86.7		17	M	19
842	743	756		85	68.3	73.3		18	F	20
644	656	703		81.7	88.3	81.7		21	M	18
677	636	742		90.8	83.3	98.3		20	M	19
651	672	656		93.3	88.3	85		15	M	19
747	710	759		88.3	85	80		20	M	19
656	634	682		90.8	91.7	93.3		23	F	18
747	729	757		88.3	83.3	81.7		13	F	19
693	689	624		96.7	93.3	91.7		15	F	18
696	668	745		87.5	90	91.7		20	F	20
612	574	629		80.8	76.7	86.7		16	F	19
927	811	865		89.2	90	91.7		16	F	18
699	720	684		95.8	96.7	96.7		12	M	21
646	626	676		77.5	91.7	93.3		20	M	19
607	617	594		75.8	85	90		4	F	18
733	718	770		87.5	83.3	85		13	F	18
683	718	693		78.3	78.3	80		20	F	19
741	772	763		90.8	93.3	81.7		24	M	19
650	699	665		90	88.3	90		19	M	18
744	727	748		82.5	76.7	88.3		27	F	18
704	695	673		91.7	95	88.3		19	F	19
845	811	846		90.8	91.7	98.3		12	M	18
634	643	637		92.5	93.3	96.7		9	F	18
722	671	795		76.7	63.3	70		22	F	20
646	667	709		97.5	90	90		12	F	18
678	683	679		87.5	90	80		17	F	19
751	698	762		79.2	81.7	90		19	M	20
742	667	711		90	85	88.3		8	F	18
808	777	829		84.2	88.3	71.7		20	F	21
698	778	750		91.7	90	95		17	F	19
868	921	895		86.7	91.7	88.3		19	F	19
819	801	839		87.5	73.3	81.7		11	F	19
835	839	792		86.7	91.7	93.3		21	F	19
562	566	603		89.2	93.3	90		11	M	18
616	641	604		98.3	93.3	95		21	F	18
631	624	625		95.8	95	98.3		16	F	18
790	758	780		88.3	85	100		11	M	18
794	775	813		86.7	90	95		15	M	18
628	666	620		88.3	95	90		14	M	18
637	633	636		90.8	96.7	88.3		23	F	18
722	717	735		92.5	96.7	98.3		16	F	19
736	741	771		81.7	80	80		18	F	18
734	737	738		84.2	86.7	90		12	not reported	not reported
779	780	804		93.3	93.3	81.7		26	F	18
907	925	885		98.3	96.7	91.7		13	F	18
582	622	660		57.5	63.3	66.7		24	M	18
729	721	754		82.5	73.3	80		22	F	18
739	762	744		90	91.7	85		23	F	18
705	709	700		84.2	86.7	80		24	F	18
736	698	727		86.7	91.7	86.7		16	F	18
671	699	697		91.7	90	91.7		21	F	19
782	813	807		90	93.3	90		16	F	18
701	723	734		90.8	90	75		20	F	18
836	795	793		85.8	93.3	88.3		14	F	18
611	599	628		83.3	85	90		19	F	19
717	725	721		90	86.7	85		20	F	18
595	573	610		80	85	76.7		8	M	18
799	792	810		90.8	80	88.3		8	F	18
715	749	725		91.7	93.3	93.3		14	F	18
855	808	826		80	80	76.7		21	F	20
723	735	760		92.5	90	95		13	F	19
700	680	667		89.2	85	96.7		12	M	18
797	794	791		88.3	90	91.7		17	F	18
612	633	608		100	96.7	93.3		21	M	20
808	819	854		81.7	86.7	81.7		10	M	20
549	568	567		75.8	73.3	65		19	F	18
538	538	528		95.8	91.7	95		11	F	19
803	856	844		86.7	75	80		18	F	19
684	681	695		94.2	91.7	90		30	M	19
764	728	755		85	90	85		11	F	19
783	690	770		87.5	86.7	90		25	F	21
545	532	628		60.8	66.7	63.3		30	F	21
674	682	648		87.5	81.7	80		20	F	20
960	981	929		71.7	73.3	66.7		13	M	19
691	682	688		90	85	81.7		12	F	19
719	758	728		85	90	86.7		12	F	20
688	728	722		85.8	86.7	90		17	F	18
798	808	850		89.2	91.7	95		17	F	18
681	700	738		82.5	76.7	78.3		23	M	20
807	821	854		89.2	93.3	81.7		20	F	22
682	816	699		90.8	86.7	93.3		15	F	18
784	736	819		89.2	93.3	85		22	M	20

## Sheet: Angry condition
RT				ACCURACY
Absent	Low	High		Absent	Low	High		AQ	Sex	Age
797	719	774		93.3	93.3	95		19	F	19
858	821	826		87.5	85	90		13	F	22
723	788	754		78.3	86.7	86.7		24	M	18
780	823	790		80	88.3	83.3		17	F	19
681	679	679		90	86.7	81.7		19	F	19
687	620	640		86.7	81.7	88.3		15	not reported	not reported
892	848	834		95.8	91.7	96.7		15	not reported	not reported
725	721	766		76.7	76.7	85		16	not reported	not reported
706	727	706		79.2	81.7	76.7		16	not reported	not reported
721	722	738		95.8	96.7	96.7		26	not reported	not reported
630	623	622		92.5	98.3	88.3		21	F	20
602	624	598		85.8	80	78.3		16	M	19
630	674	674		94.2	98.3	91.7		24	F	18
713	737	739		95	88.3	91.7		17	F	20
763	781	803		89.2	86.7	90		9	M	not reported
624	672	679		85.8	90	86.7		13	F	18
757	726	798		82.5	93.3	90		11	F	19
663	598	659		71.7	66.7	71.7		28	F	18
655	621	656		84.2	90	86.7		19	F	20
811	858	787		81.7	76.7	83.3		22	F	18
821	873	785		84.2	75	88.3		16	F	19
732	800	751		87.5	93.3	95		19	F	18
757	694	779		81.7	81.7	80		10	F	19
596	620	628		70.8	76.7	78.3		34	F	18
721	700	795		88.3	85	81.7		25	F	19
860	844	850		85.8	90	88.3		20	F	19
611	624	627		88.3	88.3	83.3		17	F	21
738	747	771		94.2	88.3	93.3		20	F	23
658	612	745		89.2	83.3	93.3		14	F	21
731	711	759		94.2	96.7	98.3		15	M	19
683	736	683		93.3	96.7	96.7		10	F	19
753	712	742		88.3	88.3	93.3		20	M	18
822	858	820		92.5	96.7	86.7		20	F	18
849	850	811		84.2	90	85		22	F	18
788	844	830		90.8	93.3	91.7		10	F	18
736	718	780		89.2	93.3	90		25	F	19
800	784	747		93.3	88.3	88.3		18	F	18
712	726	710		97.5	91.7	96.7		22	M	20
697	776	784		93.3	98.3	93.3		29	F	19
605	643	625		85.8	76.7	85		20	F	20
722	779	723		88.3	90	90		16	F	18
763	789	772		84.2	86.7	88.3		25	M	19
587	593	578		86.7	86.7	93.3		18	F	18
623	634	609		83.3	80	85		26	F	19
743	758	776		88.3	95	90		17	F	18
593	591	606		86.7	88.3	83.3		14	F	19
640	647	667		95.8	90	96.7		17	M	20
700	747	761		93.3	90	88.3		17	M	20
729	763	730		97.5	95	96.7		14	F	19
857	828	852		83.3	93.3	91.7		11	F	20
686	693	713		77.5	80	93.3		20	F	19
780	811	775		95	95	91.7		16	M	18
579	578	576		79.2	76.7	73.3		23	F	18
728	665	762		87.5	86.7	90		8	F	19
626	643	637		80	81.7	85		16	F	20
679	694	742		94.2	91.7	95		11	F	21
670	699	669		95	90	86.7		15	F	19
702	674	685		90	81.7	83.3		12	F	20
783	776	781		99.2	96.7	93.3		18	F	19
758	802	756		95	95	93.3		9	F	20
741	719	717		92.5	95	90		13	F	20
834	807	815		78.3	81.7	85		7	F	20
818	769	817		76.7	80	76.7		28	F	18
809	721	758		85.8	81.7	90		12	F	20
668	709	688		92.5	88.3	93.3		15	F	21
708	705	717		88.3	98.3	96.7		14	F	19
582	572	598		65.8	56.7	61.7		15	M	19
807	750	771		86.7	91.7	90		25	F	19
750	749	709		87.5	86.7	96.7		23	F	18
818	831	842		95	86.7	90		16	F	20
800	807	820		87.5	83.3	85		16	F	18
670	663	675		91.7	85	98.3		21	F	19
633	626	605		77.5	91.7	75		15	F	19
770	781	790		90.8	91.7	96.7		11	F	19
729	718	691		94.2	95	91.7		22	M	21
769	751	905		75.8	80	81.7		8	F	18
638	644	660		84.2	86.7	80		18	F	18
699	710	704		82.5	91.7	81.7		35	M	19
811	808	859		91.7	86.7	95		26	F	18
538	564	547		92.5	86.7	83.3		16	M	21
762	787	739		96.7	91.7	95		20	F	20
550	532	576		71.7	73.3	75		20	M	19
777	765	720		96.7	93.3	96.7		34	F	18
827	830	828		89.2	80	90		28	F	18
638	660	661		97.5	91.7	95		21	F	19
857	894	868		90	83.3	88.3		25	F	18
636	685	645		88.3	81.7	86.7		16	F	18
682	645	663		93.3	93.3	93.3		11	M	19
765	738	792		83.3	83.3	83.3		16	F	20
864	847	856		79.2	80	78.3		15	F	18
722	705	741		91.7	91.7	91.7		27	F	18
698	701	763		95.8	96.7	95		11	F	20
678	640	698		89.2	90	90		23	F	21
705	727	762		92.5	95	95		12	F	18
674	691	667		90	95	90		13	F	19
650	599	640		86.7	88.3	90		18	F	19
779	781	740		80	88.3	78.3		12	F	not reported
